# Supplementary material for: Dysbiotic Vaginal Microbiota Induces Preterm Birth Cascade via Pathogenic Molecules in the Vagina
Source: MDPI journal article supplement (doi:10.3390/metabo14010045), 2024-01-11
Supplement: s1 [file s1]

## Supplementary Materials

### Supplementary Figure S1

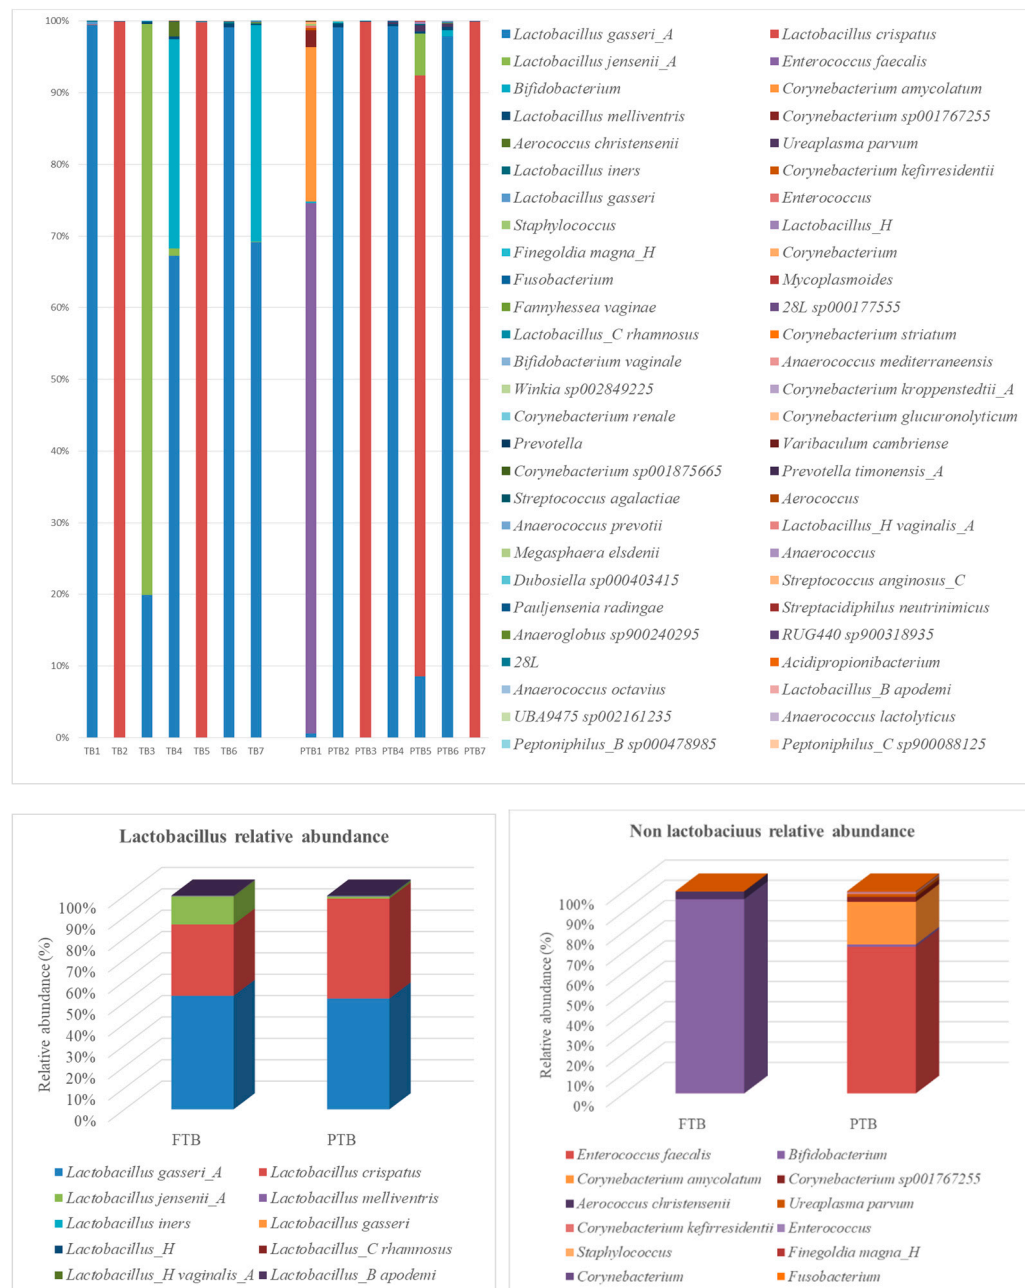

**Figure S1.** Microbiota profiling of cervicovaginal fluid (CVF) samples of full-term birth (FTB, n=7) and preterm birth (PTB, n=7) groups via next generation sequencing of the V1–V9 region.

## Supplementary Figure S2

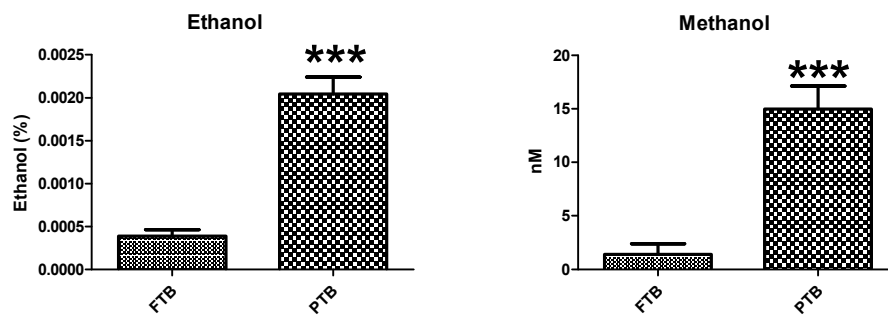

**Figure S2.** Metabolite analysis in cervicovaginal fluid (CVF) samples. Metabolites measured in CVF samples of full-term birth (FTB,  $n = 20$ ) and preterm birth (PTB,  $n = 20$ ) groups using the assay kits. Data are presented as the mean  $\pm$  standard deviation, and  $p < 0.05$  was considered statistically significant; \*\*\*  $p < 0.001$ .
